# Supplementary material for: Inference of immune cell composition on the expression profiles of mouse tissue
Source: PubMed Central journal article supplement (PMC5233994; doi:10.1038/srep40508), 2017-01-13
Supplement: srep40508-s2.pdf [file srep40508-s2.pdf]

# **Inference of immune cell composition on the expression profiles of mouse tissue**

Ziyi Chen<sup>1, †</sup>, Anfei Huang<sup>1, †</sup>, Jiya Sun<sup>1</sup>, Taijiao Jiang<sup>1</sup>, F. Xiao-Feng Qin<sup>1, \*</sup> and Aiping  
Wu<sup>1, \*</sup>

<sup>1</sup>Center for Systems Medicine, Institute of Basic Medical Sciences, Chinese  
Academy of Medical Sciences & Peking Union Medical College, Beijing 100005,  
Suzhou Institute of Systems Medicine, Suzhou, Jiangsu 215123, China;

\*To whom correspondence should be addressed. Email: [wap@ism.cams.cn](mailto:wap@ism.cams.cn) (A.W.);  
[fqin1@foxmail.com](mailto:fqin1@foxmail.com) (F.X.Q.).

†These authors contributed equally to this work.

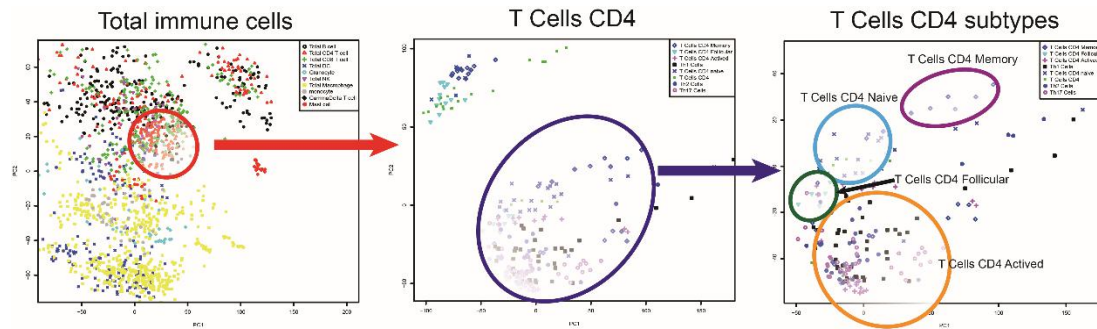

**Supplemental figure S1.** Dataset selection with PCA. All immune cell datasets were first separated into major cell types, and further into cell subtypes.

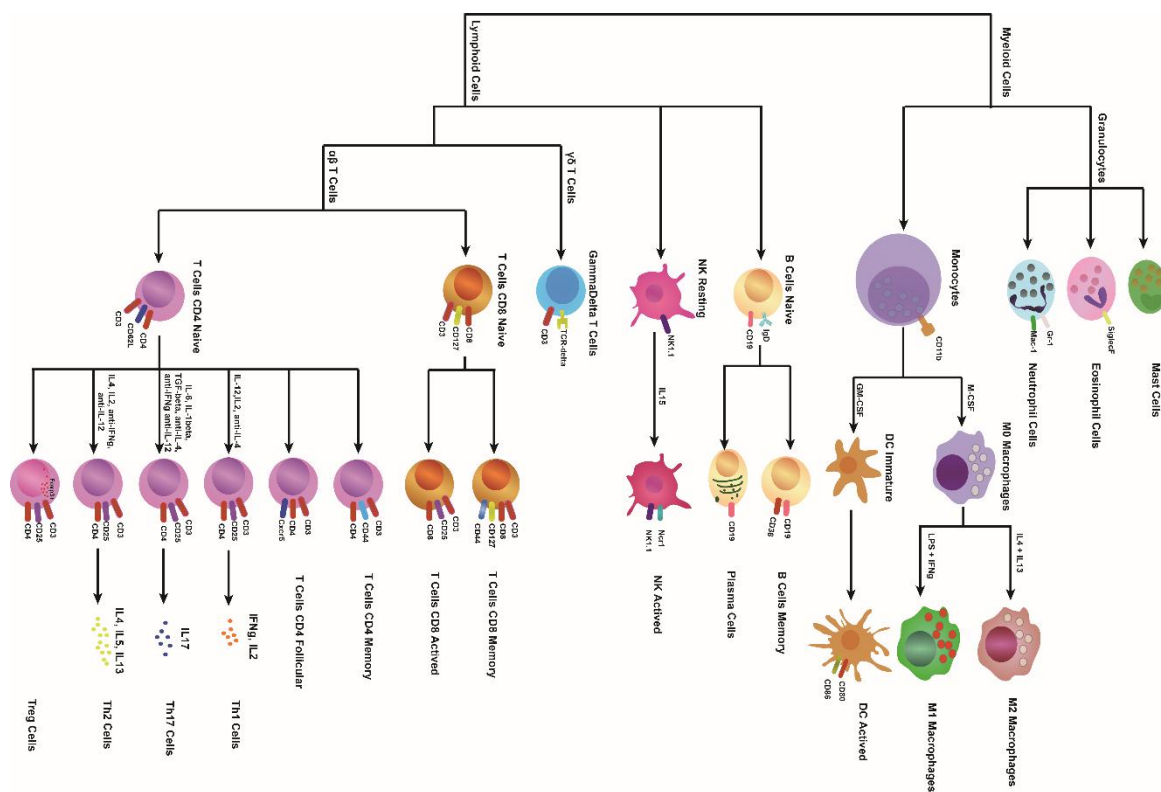

**Supplemental figure S2.** The distribution of 25 selected immune cell types in the differentiation tree of hematopoietic cells.



**Supplemental figure S4.** Estimation of immune cell compositions in four mouse immune tissues collected by ourselves. Four immune tissues consist of bone marrow (BM), spleen (SP), peripheral blood mononuclear cell (PBMC) and lymph node (LN). The cell type compositions were shown as bar chart.

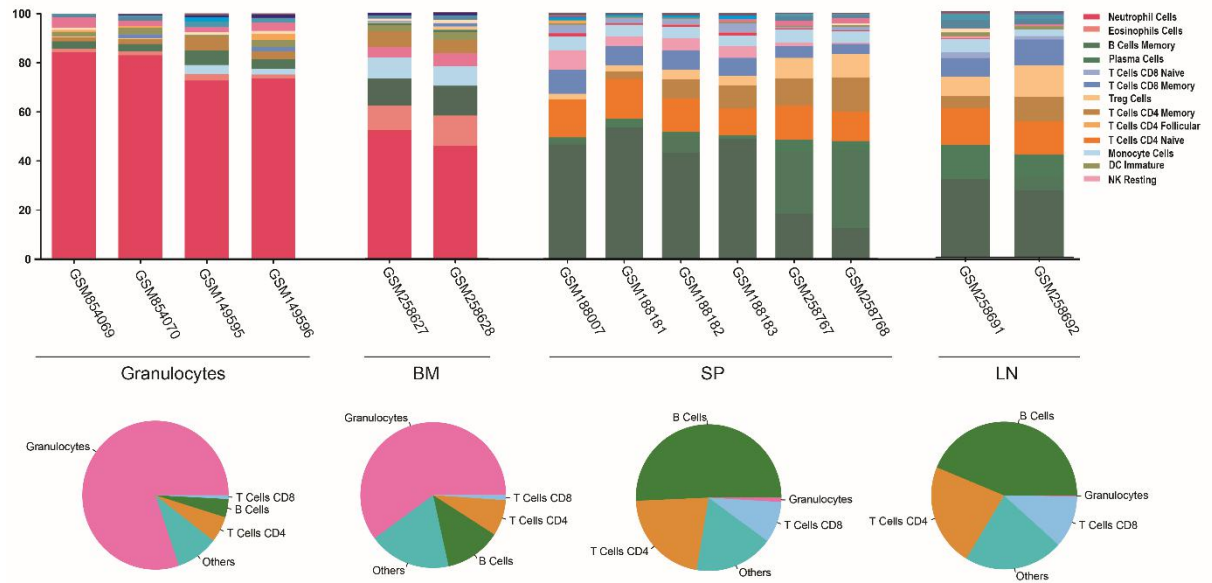

**Supplemental figure S5.** Estimation of immune cell compositions in four mouse immune tissues from public datasets. Four immune tissues consist of granulocytes bone marrow (BM), spleen (SP) and lymph node (LN). The cell type compositions were shown as bar chart. Five major summarized cell types were shown as pie chart.

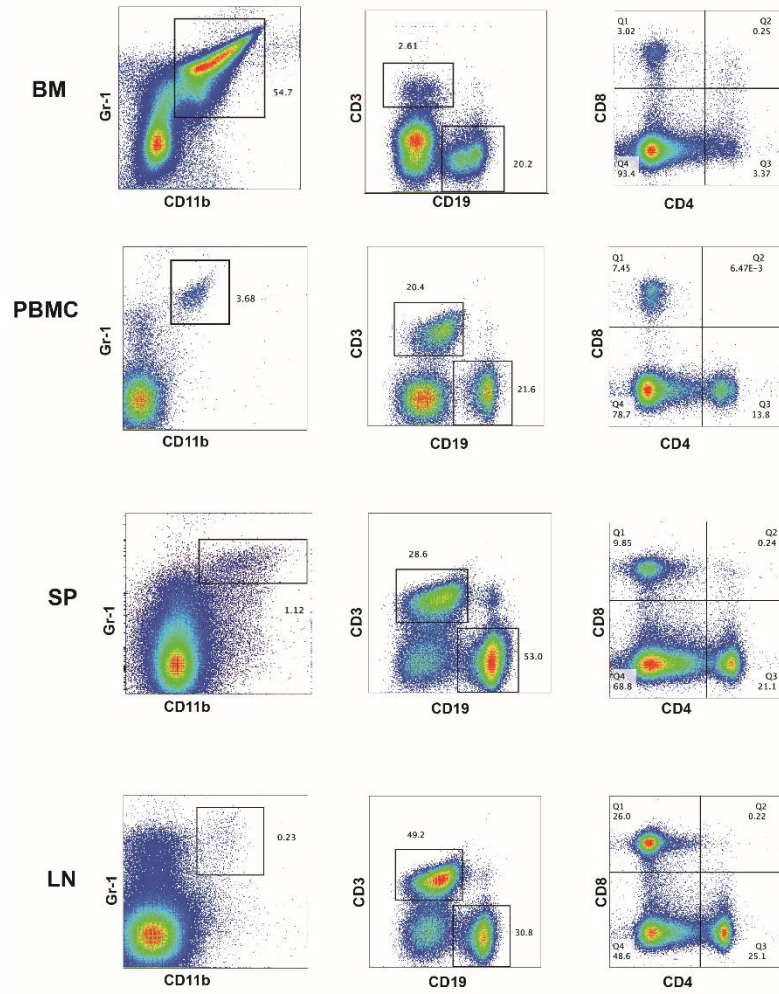

**Supplemental figure S6.** Gating strategy for flow cytometry scatter plots to analyze the frequency of Granulocytes, T Cells CD4<sup>+</sup>, T Cells CD8<sup>+</sup> and B Cells in four immune organs consist of bone marrow (BM), spleen (SP), peripheral blood mononuclear cell (PBMC) and lymph node (LN).

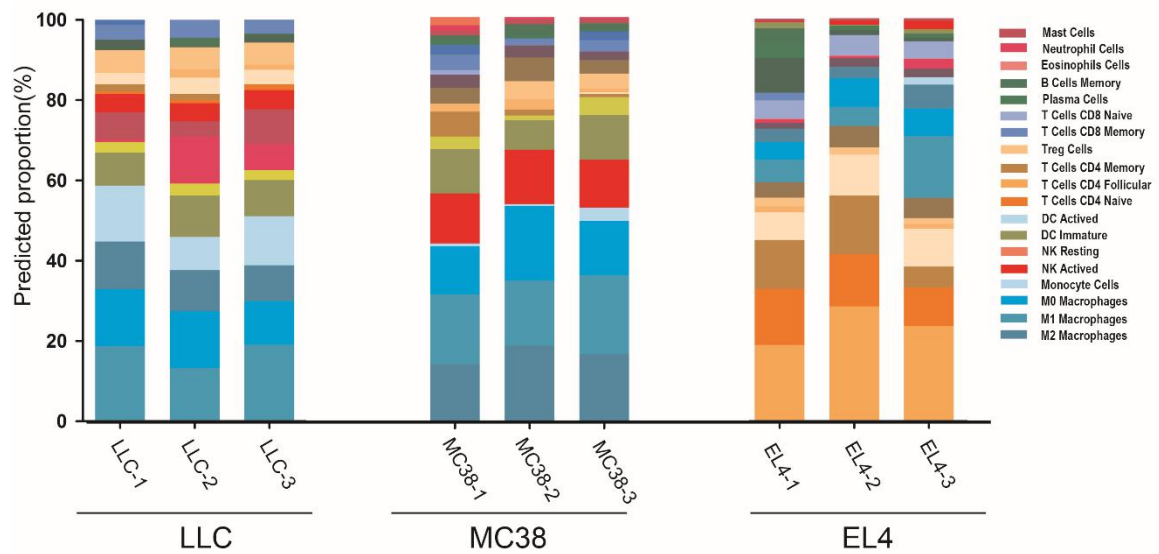

**Supplemental figure S7.** Estimation of immune cell compositions in three tumor tissues collected by ourselves. Four immune tissues consist of bone marrow (BM), spleen (SP), peripheral blood mononuclear cell (PBMC) and lymph node (LN). The cell type compositions were shown as bar chart.

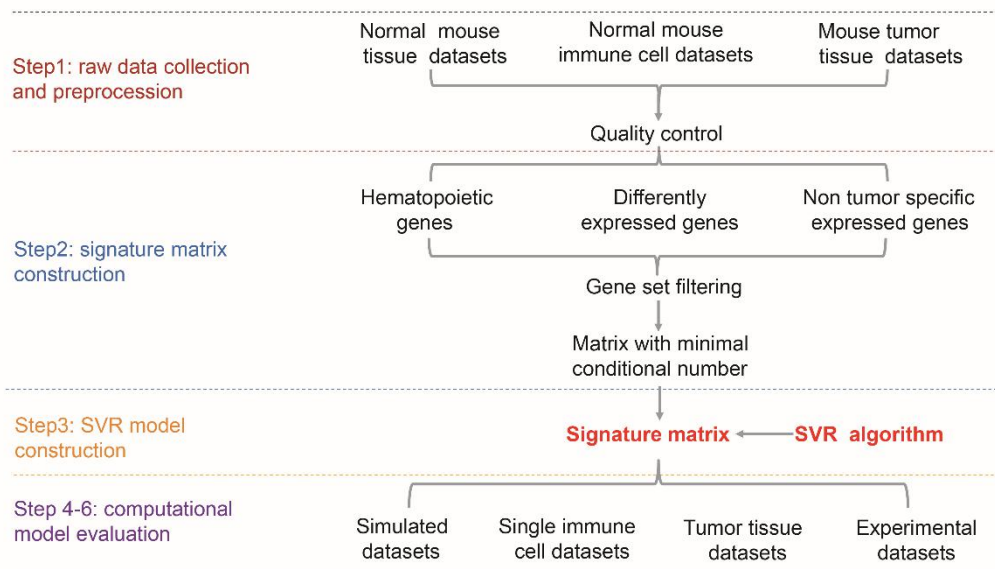

**Supplemental figure S8.** The schematic of the ImmuCC model. Four main steps consist of data collection, gene set selection, signature matrix construction and model validation.

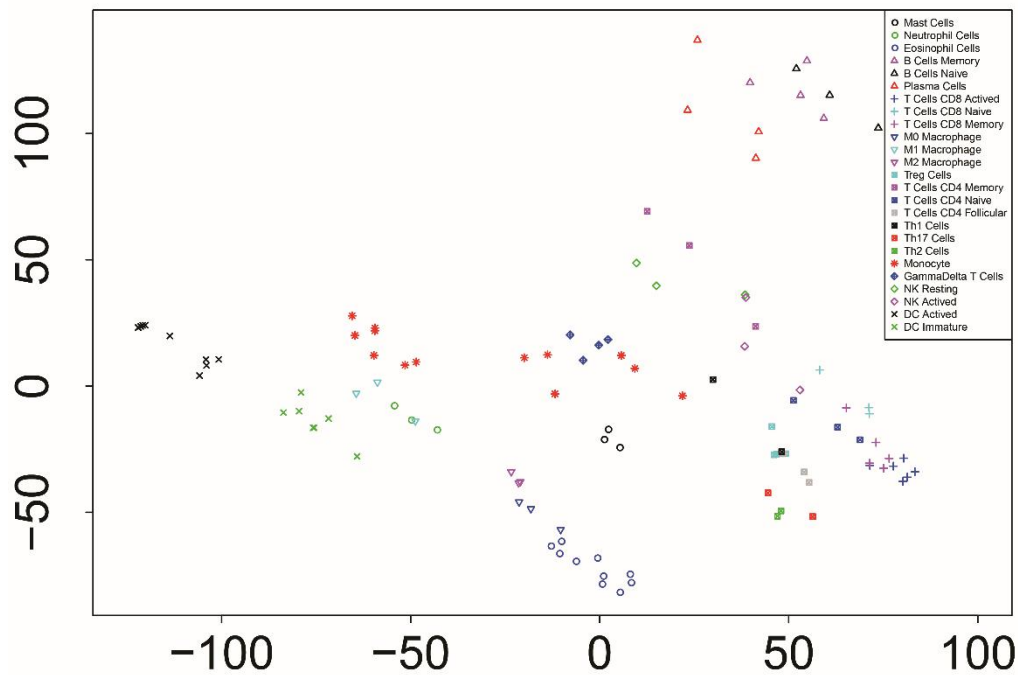

**Supplemental figure S9.** PCA of 25 selected immune cell types.

**Supplementary Table S1** Validation of ImmuCC on Agilent and Illumina platforms. Transcriptomic data profiled on Agilen4x44K, Agilen8x60K and Illumina MouseWG-6 v2.0 were calculated with our model. Immune cell type with the highest fraction in each sample was compared to the known purified cell type and counted as correct if they were matched.

| Cell type       | Platforms   | Data set | Correct number | Total number | Percent correct |
|-----------------|-------------|----------|----------------|--------------|-----------------|
| Dendritic Cells | Agilen4x44K | GSE43169 | 2              | 5            | 40%             |
| Dendritic Cells | Agilen4x44K | GSE56929 | 24             | 24           | 100%            |
| Macrophages     | Agilen4x44K | GSE55693 | 20             | 20           | 100%            |
| Macrophages     | Agilen4x44K | GSE71814 | 6              | 6            | 100%            |
| T Cells CD4     | Agilen4x44K | GSE57098 | 12             | 12           | 100%            |

|                 |                            |          |    |    |      |
|-----------------|----------------------------|----------|----|----|------|
| T Cells CD4     | Agilen4x44K                | GSE58152 | 9  | 9  | 100% |
| B cells         | Agilen8x60K                | GSE63391 | 7  | 8  | 88%  |
| B cells         | Agilen8x60K                | GSE73026 | 4  | 4  | 100% |
| M1 macrophage   | Agilen8x60K                | GSE51466 | 3  | 3  | 100% |
| M2 macrophage   | Agilen8x60K                | GSE51466 | 3  | 3  | 100% |
| Macrophages     | Agilen8x60K                | GSE51466 | 5  | 6  | 83%  |
| Macrophages     | Agilen8x60K                | GSE58003 | 2  | 2  | 100% |
| Macrophages     | Agilen8x60K                | GSE58098 | 3  | 3  | 100% |
| Macrophages     | Agilen8x60K                | GSE64473 | 9  | 9  | 100% |
| Macrophages     | Agilen8x60K                | GSE73026 | 8  | 8  | 100% |
| Macrophages     | Agilen8x60K                | GSE73311 | 24 | 24 | 100% |
| Macrophages     | Agilen8x60K                | GSE39660 | 6  | 6  | 100% |
| Macrophages     | Agilen8x60K                | GSE80065 | 6  | 6  | 100% |
| Neutrophils     | Agilen8x60K                | GSE55995 | 13 | 16 | 81%  |
| T Cells CD4     | Agilen8x60K                | GSE50149 | 10 | 10 | 100% |
| T Cells CD4     | Agilen8x60K                | GSE60356 | 14 | 14 | 100% |
| T Cells CD4     | Agilen8x60K                | GSE67465 | 12 | 12 | 100% |
| T Cells CD4     | Agilen8x60K                | GSE76693 | 3  | 3  | 100% |
| T Cells CD8     | Agilen8x60K                | GSE45673 | 6  | 8  | 75%  |
| B Cells         | Illumina<br>MouseWG-6 v2.0 | GSE51604 | 12 | 12 | 100% |
| Dendritic Cells | Illumina<br>MouseWG-6 v2.0 | GSE60146 | 21 | 21 | 100% |
| Macrophages     | Illumina<br>MouseWG-6 v2.0 | GSE68167 | 17 | 18 | 94%  |
| Neutrophils     | Illumina<br>MouseWG-6 v2.0 | GSE30887 | 8  | 10 | 80%  |



|             |                            |          |    |    |      |
|-------------|----------------------------|----------|----|----|------|
| NK Cells    | Illumina<br>MouseWG-6 v2.0 | GSE34237 | 4  | 9  | 44%  |
| T Cells CD4 | Illumina<br>MouseWG-6 v2.0 | GSE52185 | 35 | 35 | 100% |
| T Cells CD8 | Illumina<br>MouseWG-6 v2.0 | GSE44140 | 12 | 12 | 100% |
